# Supplementary material for: Large carbon cycle sensitivities to climate across a permafrost thaw gradient in subarcticSweden
Source: Copernicus journal article supplement (doi:10.5194/tc-2018-215), 2018-10-17
Supplement: Supplementary file 1 [file tc-2018-215-supplement.pdf]

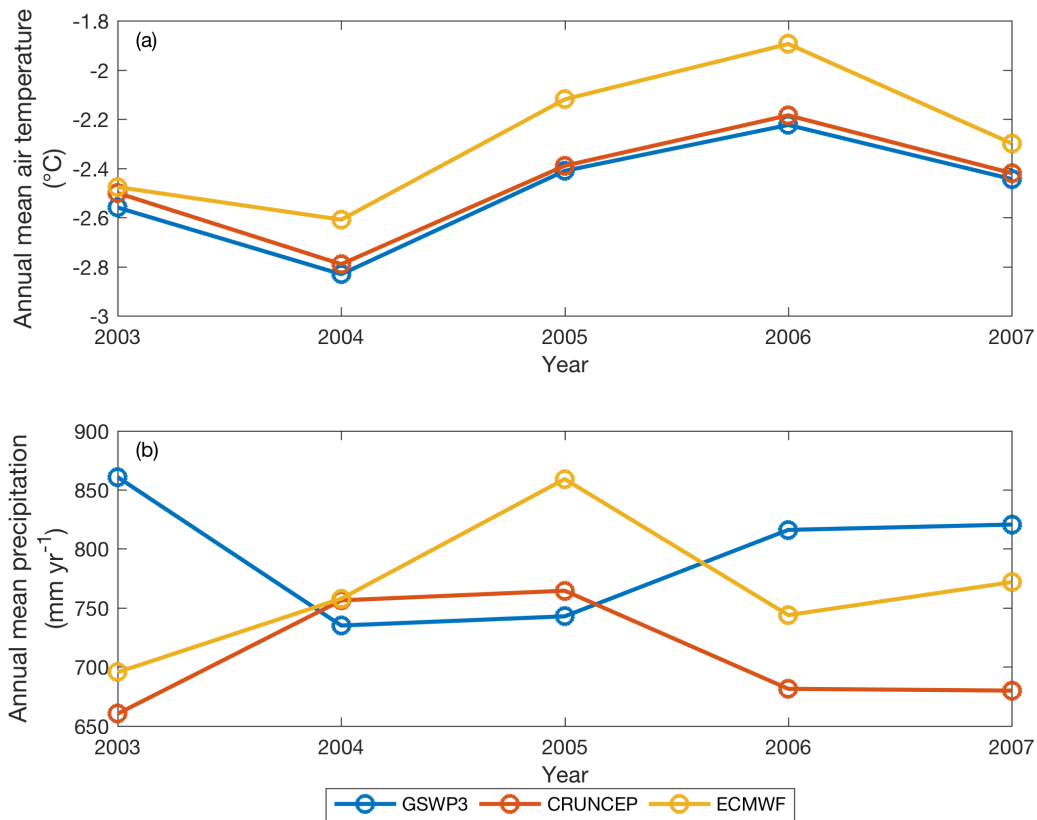

963

964 Supplemental Material Figure 1. Annual mean air temperature (a) and precipitation (b)

965 extracted from GSWP3 (blue), CRUNCEP (red), and ECMWF (yellow) at the Stordalen

966 Mire.
