# Supplementary material for: Large carbon cycle sensitivities to climate across a permafrost thaw gradient in subarcticSweden
Source: Copernicus journal article supplement (doi:10.5194/tc-2018-215), 2018-10-17
Supplement: Supplementary file [file tc-2018-215-AC4-supplement.pdf]

1 **Model description**

2 *Ecosys* represents multiple canopy and soil layers and fully coupled carbon, energy,  
3 water, and nutrient cycles solved at an hourly time step. Surface energy and water exchanges  
4 drive soil heat and water transfers to determine soil temperatures and water contents. These  
5 transfers drive soil freezing and thawing and, hence, active layer depth, through the general heat  
6 flux equation. Carbon uptake is controlled by plant water status calculated from convergence  
7 solutions that equilibrate total root water uptake with transpiration. Atmospheric warming  
8 increases surface heat advection, soil heat transfers, and hence active layer depth. Canopy  
9 temperatures affect CO<sub>2</sub> fixation rates from their effects on carboxylation and oxygenation  
10 modeled with Arrhenius functions for light and dark reactions. Soil temperatures affect  
11 heterotrophic respiration through the same Arrhenius function as for dark reactions.

12 Carbon uptake is also affected by plant nitrogen uptake. The model represents fully  
13 coupled transformations of soil carbon, nitrogen, and phosphorus through microbially driven  
14 processes. Soil warming enhances carbon uptake by hastening microbial mineralization and root  
15 nitrogen uptake. Carbon uptake is affected by phenology with leafout and leafoff (deciduous  
16 plants) or dehardening and hardening (evergreen plants) being determined by accumulated  
17 exposure to temperatures above set values while day length is increasing or below set values  
18 while day length is decreasing. Senescence is driven by excess maintenance respiration and by  
19 phenology in deciduous plant functional types.

20

21 *Ecosystem-Atmosphere energy exchange:*

22 Canopy energy and water exchanges in *ecosys* are calculated through a multi-layered  
23 soil-root-canopy system. The clumping effect for each leaf and stem surface is represented by a

24 species-specific interception fraction to simulate non-uniformity in the horizontal distribution of  
25 leaves within each canopy layer. Coupled first-order closure schemes are solved between the  
26 atmosphere and each of leaf and stem surfaces in the multi-layered canopy to achieve energy  
27 balance at each model time step. Once the system converges to the required canopy temperature,  
28 latent and sensible heat fluxes of each canopy layer are calculated based on the simulated vapor  
29 pressure deficit, canopy-atmosphere temperature gradient, aerodynamic conductance, and  
30 stomatal conductance. Canopy heat storage is calculated from changes in canopy temperature  
31 and heat capacities of leaves, twigs, and stems.

32

### 33 *Canopy water relations:*

34 A convergence solution is sought for the canopy water potential of each plant population  
35 at which the difference between its transpiration and total root water uptake equals the difference  
36 between its water contents at the previous and current water potentials. Canopy water potential  
37 controls transpiration and soil-root water uptake, which affects stomatal conductance and thereby  
38 all the processes (e.g., canopy temperature and vapor pressure) described in “Ecosystem-  
39 Atmosphere energy exchange”.

40

### 41 *Canopy carbon and nutrient cycling:*

42 Leaf carboxylation rates are adjusted from those calculated under non-limiting water  
43 potential to those under current water potential. The gross canopy CO<sub>2</sub> fixation is the sum of the  
44 leaf carboxylation rate of each leaf surface present on each branch of each plant species, which is  
45 then transported to a mobile pool of carbon storage. Storage carbon oxidized in excess of  
46 maintenance respiration requirements is used as growth respiration to drive the formation of new

47 biomass. Net CO<sub>2</sub> fixation is calculated as the difference between gross fixation and the sum of  
48 maintenance, growth, and senescence respiration in the simulated canopy.

49 Nutrient (nitrogen and phosphorous) uptake is calculated for each plant species by  
50 solving for aqueous concentrations at root and mycorrhizal surfaces in each soil layer at which  
51 radial transport by mass flow and diffusion from the soil solution to the surfaces equals active  
52 uptake by the surfaces. This solution dynamically links rates of soil nutrient transformations with  
53 those of root and mycorrhizal nutrient uptake. The products of nitrogen and phosphorous uptake  
54 are transported to mobile pools of nitrogen and phosphorous stored in each root and mycorrhizal  
55 layer, which regulate vegetation growth.

56

57 *Plant functional type dynamics:*

58 The model represents prognostic vegetation dynamics with internal resource allocation  
59 and remobilization. Shifts in plant functional types are modeled through processes of plant  
60 functional type competition for light, water, and nutrients within each canopy and rooted soil  
61 layer depending on leaf area and root length. Each plant functional type competes for nutrient  
62 and water uptake from common nutrient and water stocks held across multi-layer soil profiles,  
63 calculated from algorithms for transformations and transfers of soil carbon, nitrogen, and  
64 phosphorus, and for transfers of soil water. Modeled differences in plant functional type  
65 functional traits determine the strategy of resource acquisition and allocation that drive growth,  
66 resource remobilization, and litterfall, and therefore each plant functional type dynamic  
67 competitive capacity under different environmental conditions.

68

69 *Soil microbial activity:*

70           The modeling of microbial activity is based on six organic states: solid, soluble, sorbed,  
71 acetate, microbial biomass, and microbial residues. Carbon, nitrogen and phosphorous may move  
72 among these states within each of four organic matter-microbe complexes: plant litterfall, animal  
73 manure, particulate organic matter, and humus. Microbial biomass in *ecosys* is an active agent of  
74 organic matter transformation. The rate at which each component is hydrolyzed is a function of  
75 substrate concentration that approaches a first-order function at low concentrations, and a zero-  
76 order function at high concentrations. These rates are regulated by soil temperature through an  
77 Arrhenius function and by soil water content through its effect on microbial concentration.  
78 Similar to the growth and decline of vegetation biomass described above, the net change in  
79 microbial biomass is determined by the difference between heterotrophic respiration and  
80 maintenance respiration. When heterotrophic respiration is greater than maintenance respiration,  
81 the excessive amount of respiration is used as growth respiration that drives microbial growth  
82 according to the energy requirements of biosynthesis.

83

84 Supplemental Material Table 1. Key soil properties of the (a) palsa (b) bog (c) fen at Stordalen

85 Mire used in *ecosys*.

|                  | Depth<br>m | BD<br>mg m <sup>-3</sup> | K <sub>sat</sub><br>mm h <sup>-1</sup> | TOC<br>g kg <sup>-1</sup> | TON<br>g kg <sup>-1</sup> | FC<br>m <sup>3</sup> m <sup>-3</sup> | WP<br>m <sup>3</sup> m <sup>-3</sup> | pH  |
|------------------|------------|--------------------------|----------------------------------------|---------------------------|---------------------------|--------------------------------------|--------------------------------------|-----|
| <i>(a) Palsa</i> |            |                          |                                        |                           |                           |                                      |                                      |     |
|                  | 0.01       | 0.10                     | 100                                    | 452.04                    | 8.88                      | 0.4                                  | 0.15                                 | 3.9 |
|                  | 0.05       | 0.10                     | 100                                    | 438.38                    | 9.62                      | 0.4                                  | 0.15                                 | 3.9 |
|                  | 0.1        | 0.12                     | 25                                     | 388.16                    | 10.90                     | 0.4                                  | 0.15                                 | 3.9 |
|                  | 0.2        | 0.20                     | 25                                     | 343.97                    | 12.21                     | 0.4                                  | 0.15                                 | 3.9 |
|                  | 0.3        | 0.30                     | 25                                     | 331.83                    | 13.86                     | 0.4                                  | 0.15                                 | 4.1 |
|                  | 0.4        | 0.80                     | 20                                     | 304.80                    | 14.19                     | 0.4                                  | 0.15                                 | 4.5 |
|                  | 0.5        | 1.20                     | 18                                     | 208.73                    | 10.89                     | 0.4                                  | 0.15                                 | 4.4 |
|                  | 0.6        | 1.20                     | 15                                     | 206.77                    | 10.88                     | 0.4                                  | 0.15                                 | 4.4 |
|                  | 0.7        | 1.23                     | 13                                     | 203.92                    | 10.77                     | 0.4                                  | 0.15                                 | 5.1 |
|                  | 0.9        | 1.25                     | 12                                     | 200.71                    | 11.10                     | 0.4                                  | 0.15                                 | 5.3 |
|                  | 1.1        | 1.25                     | 12                                     | 150.00                    | 8.60                      | 0.2                                  | 0.11                                 | 5.3 |
|                  | 1.3        | 1.35                     | 10                                     | 120.00                    | 7.60                      | 0.2                                  | 0.11                                 | 5.3 |
|                  | 1.5        | 1.35                     | 10                                     | 120.00                    | 7.60                      | 0.2                                  | 0.11                                 | 5.3 |
| <i>(b) Bog</i>   |            |                          |                                        |                           |                           |                                      |                                      |     |
|                  | 0.01       | 0.02                     | 500                                    | 390.20                    | 4.22                      | 0.4                                  | 0.15                                 | 4.2 |
|                  | 0.05       | 0.02                     | 500                                    | 407.15                    | 5.59                      | 0.4                                  | 0.15                                 | 4.2 |
|                  | 0.1        | 0.04                     | 500                                    | 403.20                    | 6.81                      | 0.4                                  | 0.15                                 | 4.2 |
|                  | 0.2        | 0.04                     | 500                                    | 418.90                    | 8.83                      | 0.4                                  | 0.15                                 | 4.2 |
|                  | 0.3        | 0.15                     | 300                                    | 461.90                    | 11.93                     | 0.4                                  | 0.15                                 | 4.2 |
|                  | 0.4        | 0.35                     | 200                                    | 466.60                    | 13.06                     | 0.4                                  | 0.15                                 | 4.4 |
|                  | 0.5        | 1.05                     | 100                                    | 466.20                    | 13.30                     | 0.4                                  | 0.15                                 | 4.6 |
|                  | 0.6        | 1.25                     | 60                                     | 406.20                    | 13.30                     | 0.4                                  | 0.15                                 | 4.7 |
|                  | 0.7        | 1.30                     | 50                                     | 406.20                    | 13.30                     | 0.4                                  | 0.15                                 | 4.8 |
|                  | 0.9        | 1.33                     | 40                                     | 406.20                    | 13.30                     | 0.4                                  | 0.15                                 | 4.9 |
|                  | 1.1        | 1.35                     | 25                                     | 400.00                    | 13.60                     | 0.2                                  | 0.11                                 | 5.0 |
|                  | 1.3        | 1.35                     | 15                                     | 400.00                    | 13.60                     | 0.2                                  | 0.11                                 | 5.0 |
|                  | 1.5        | 1.35                     | 15                                     | 400.00                    | 13.60                     | 0.2                                  | 0.11                                 | 5.0 |
| <i>(c) Fen</i>   |            |                          |                                        |                           |                           |                                      |                                      |     |
|                  | 0.01       | 0.02                     | 500                                    | 436.90                    | 13.47                     | 0.4                                  | 0.15                                 | 5.7 |
|                  | 0.05       | 0.02                     | 500                                    | 435.18                    | 14.97                     | 0.4                                  | 0.15                                 | 5.7 |
|                  | 0.1        | 0.04                     | 500                                    | 435.14                    | 15.55                     | 0.4                                  | 0.15                                 | 5.7 |
|                  | 0.2        | 0.04                     | 500                                    | 380.83                    | 15.55                     | 0.4                                  | 0.15                                 | 5.7 |
|                  | 0.3        | 0.15                     | 300                                    | 340.83                    | 14.47                     | 0.4                                  | 0.15                                 | 5.7 |
|                  | 0.4        | 0.35                     | 200                                    | 336.51                    | 16.49                     | 0.4                                  | 0.15                                 | 5.7 |
|                  | 0.5        | 0.70                     | 100                                    | 336.51                    | 17.65                     | 0.4                                  | 0.15                                 | 5.7 |

|     |      |    |        |       |     |      |     |
|-----|------|----|--------|-------|-----|------|-----|
| 0.6 | 1.10 | 60 | 430.21 | 22.65 | 0.4 | 0.15 | 5.7 |
| 0.7 | 1.20 | 50 | 430.21 | 22.65 | 0.4 | 0.15 | 5.8 |
| 0.9 | 1.25 | 40 | 430.51 | 22.65 | 0.4 | 0.15 | 5.9 |
| 1.1 | 1.30 | 25 | 430.51 | 22.60 | 0.2 | 0.11 | 6.0 |
| 1.3 | 1.35 | 15 | 380.00 | 20.60 | 0.2 | 0.11 | 6.0 |
| 1.5 | 1.35 | 15 | 380.00 | 20.60 | 0.2 | 0.11 | 6.0 |

86 Abbreviations BD: bulk density,  $K_{sat}$ : saturated hydraulic conductivity, TOC: total organic  
87 carbon, TON: total organic nitrogen, FC: field capacity, WP: wilting point.

88

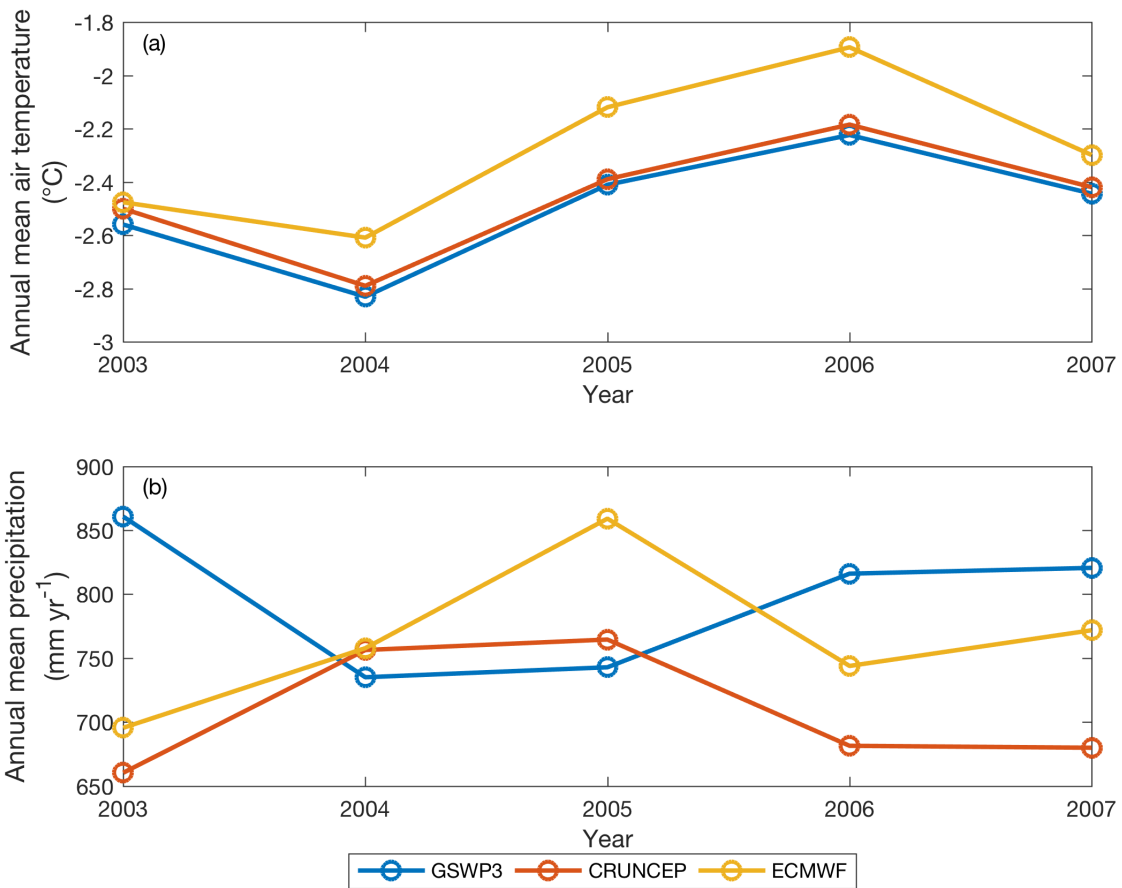

89

90 Supplemental Material Figure 1. Annual mean air temperature (a) and precipitation (b) extracted

91 from GSWP3 (blue), CRUNCEP (red), and ECMWF (yellow) at the Stordalen Mire.

92
